# Supplementary material
Source: Springer Nature journal article supplement (https://www.springermedizin.de/resource/supplementary/12958_2010_763_MOESM1_ESM.pdf/9568434)

A

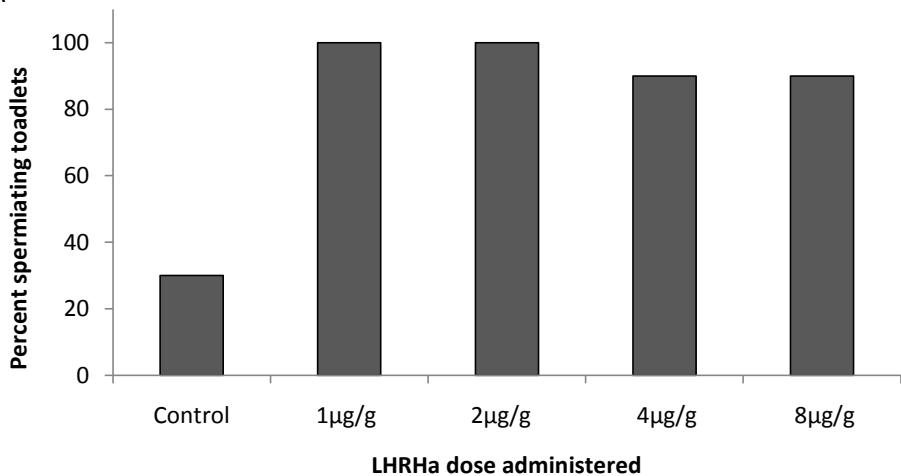

B

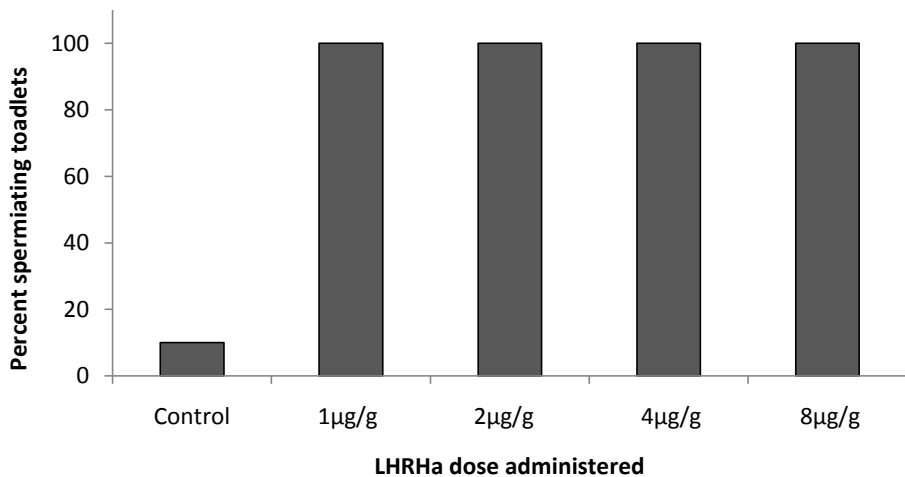

C

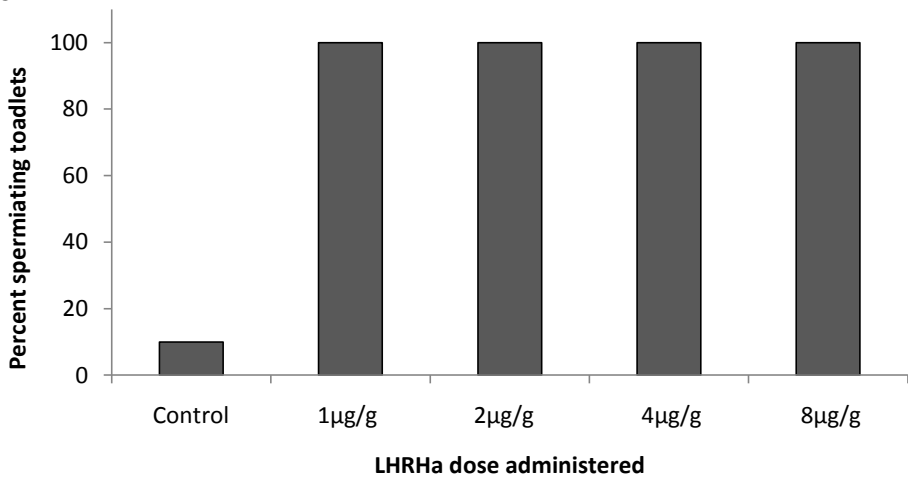

Supplement: MOESM1 [file 9568434]
